# Supplementary material for: Comparative analysis of prophage-like elements in Helicobacter sp. genomes
Source: PeerJ journal article supplement (doi:10.7717/peerj.2012), 2016-05-05
Supplement: Figure_S1.pdf [file Figure_S1.pdf]

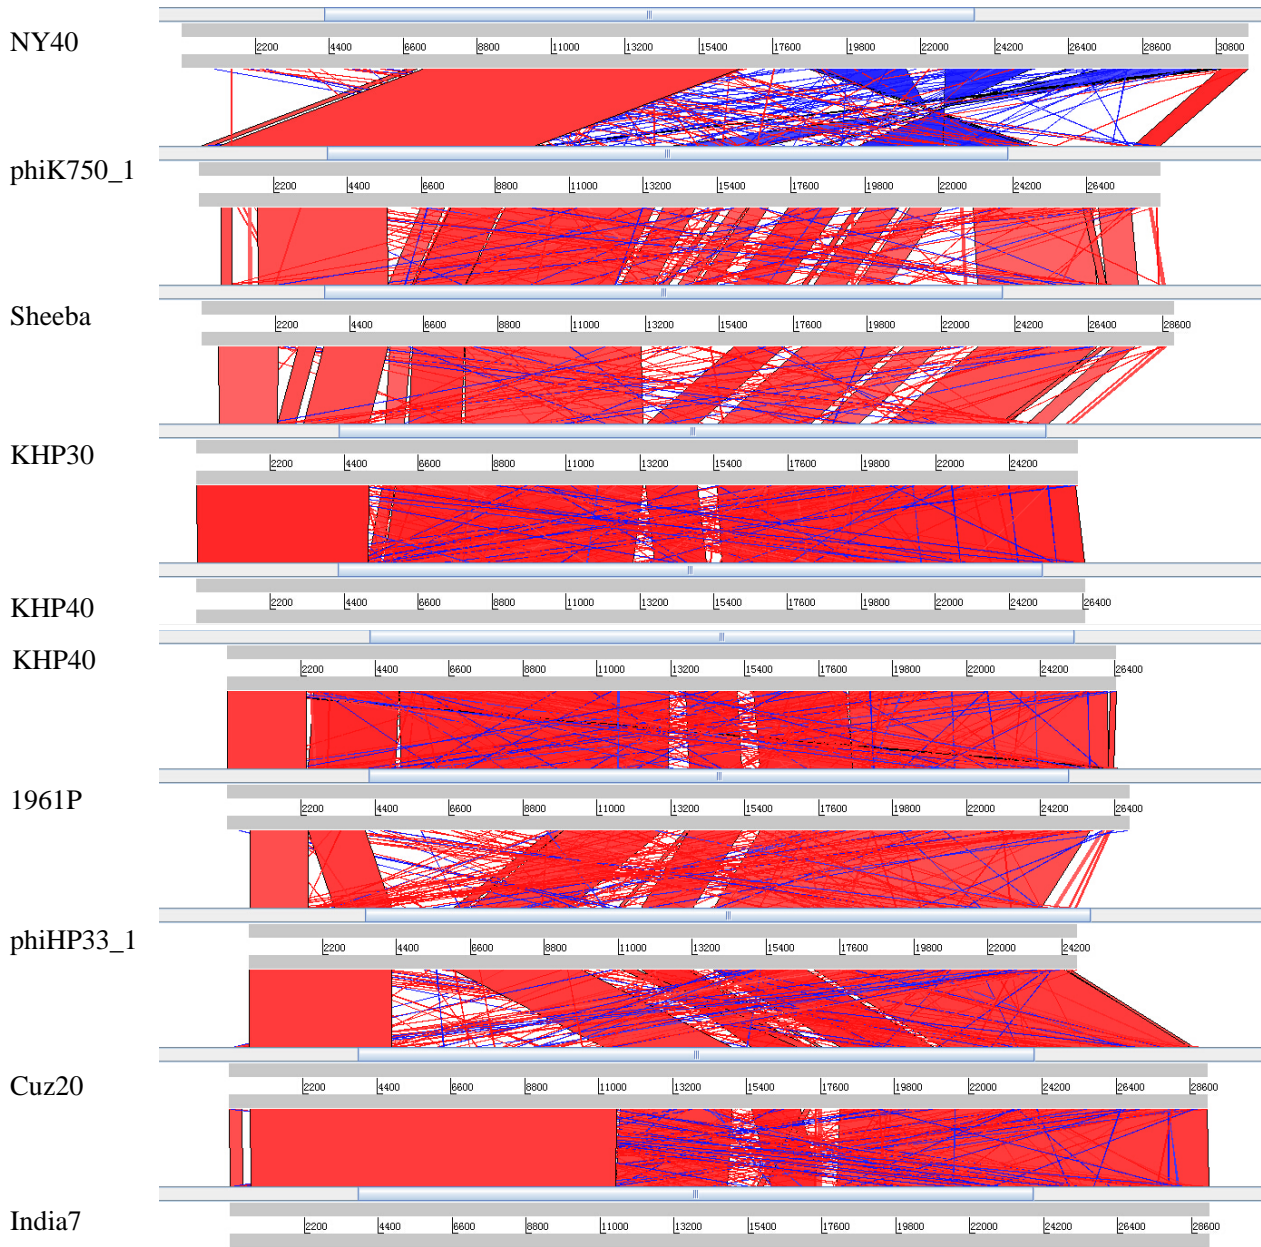

Figure S1. Comparative genomic analyses of clusterA1 phages of *Helicobacter*
